# Supplementary material
Source: publisher figshare collection journal article supplement (https://acs.figshare.com/ndownloader/files/4393258)
Supplement: Supplementary file 1 [file 4393258]

data_global 
_audit_creation_date        09-06-08
_audit_creation_method CRYSTALS_ver_12.86

_oxford_structure_analysis_title  'nans060609 in P-1'
_chemical_name_systematic         ?
_chemical_melting_point           ?

#looking for refcif 
 
 
# Check this file using the IUCr facility at: 
# http://checkcif.iucr.org/ 
 
# The content below is held in the file 'script/refcif.dat'. This is a text 
# file which you may edit to reflect local conditions. 
# Items which need looking at are represented by a '?'. 
# Items for which there are choices are prefixed with 'choose from'. 
 
_publ_contact_letter 
; 
; 
_publ_contact_author_name         'Nans Roques' 
_publ_contact_author_address 
; 
CNRS LCC (Laboratoire de Chimie de Coordination) 
205, route de Narbonne, F-31077 Toulouse, France.
; 
 
_publ_contact_author_phone        '(+33) 561-333-157' 
_publ_contact_author_fax          '(+33) 561-333-003' 
_publ_contact_author_email        'nans.roques@lcc-toulouse.fr' 
_publ_requested_journal           'Crystal Growth and Design' 
_publ_requested_category          EO # choose from: FI FM FO CI CM CO AD 
_publ_requested_coeditor_name     '' 
 
_publ_section_title 
# Title of paper - generally just the systematic or trivial name 
; Driving assembly of zirconium tetra-oxalate 
metallotectons and benzimidazolium cations: 
from three dimensionnal hydrogen-bonded compact 
architectures to open-frameworks.
; 
 
# The loop structure below should contain the names and addresses of all 
# authors, in the required order of publication. Repeat as necessary. 
loop_ 
 _publ_author_name 
 _publ_author_address 
 _publ_author_footnote 
 'Georges Mouchaham' # Author 1 
; 
CNRS LCC (Laboratoire de Chimie de Coordination) 
205, route de Narbonne, F-31077 Toulouse, France.
; 
; 
 ? # Footnote for author 1 
; 
 'Nans Roques' # Author 2 
; 
CNRS LCC (Laboratoire de Chimie de Coordination) 
205, route de Narbonne, F-31077 Toulouse, France.
; 
; 
 ? # Footnote 2 
; 
 'Inhar Imaz' # Author 2 
; 
Esfera UAB, ICN CSIC, CIN2, Bellaterra 08193, Spain
; 
; 
 ? # Footnote 2 
;  
 'Carine Duhayon' # Author 2 
; 
CNRS LCC (Laboratoire de Chimie de Coordination) 
205, route de Narbonne, F-31077 Toulouse, France. 
; 
; 
 ? # Footnote 2 
; 
 'Jean-Pascal Sutter' # Author 2 
; 
CNRS LCC (Laboratoire de Chimie de Coordination) 
205, route de Narbonne, F-31077 Toulouse, France.
; 
; 
 ? # Footnote 2 
;
 
_publ_section_abstract 
# Text of the abstract 
# (a) The Abstract must be self-contained and comprehensible 
# without the rest of the paper. This means no references 
# to atom names or to compound numbers; compounds must be 
# identified as the title compound, or by name or by some other 
# means such as derivatives of each other (e.g. "the 
# corresponding ketone"). 
# (b) The chemical formula of "the title compound" must be given. 
# (c) Any crystallographic molecular symmetry should be 
# mentioned, and also the presence of more than one molecule 
# in the asymmetric unit (i.e. anything other than Z'=1). 
; 
? 
; 
 
_publ_section_related_literature  # Not in version 2.3.1 
############################################################### 
# Essential references (e.g. to the origin of the material studied, related 
# structural studies, and to information supporting the reported structure) 
# should be cited in this section, with appropriate very brief explanatory 
# text, for example `The synthesis of the complex is described by Jones 
# (2001). The anhydrous complex has essentially the same coordination 
# geometry (Smith, 2003).' In addition, all references included in the 
# supplementary materials, but not elsewhere in the published article, 
# should be given here. The simple text `For related literature, see:...' 
# may be used, but further details should be provided in the Comment 
# section, which forms part of the supplementary material. 
############################################################### 
; 
? 
; 
 
_publ_section_comment 
# Text of the paper 
# Note that atoms are referenced as N2, not N(2) or N~2~ 
# If text containing () occur within (), the outer ones should be [] 
# Figures should be referenced as Fig. 
; 
? 
; 
_publ_section_acknowledgements    # Acknowledgments 
; 
? 
; 
_publ_section_figure_captions 
# Captions to figures - Start each caption on a new line after a blank line 
; 
; 
 
 
data_1 
 
_publ_section_exptl_refinement 
# Some potentially useful phrases are donated by Bill Clegg: 
; 

The H atoms were all refined with riding constraints. 
 
; 
 
_publ_section_exptl_prep 
# Brief details or a reference. Include solvent if known 
; 
? 
; 
 
# Hand-made tables can be put in the cif. The number of columns 
# is set in the loop header. 
# The contants of each column can either be a piece of text 
# without any spaces (eg a number) or other text enclosed in " " 
# Remove the leading # in the following example 
 
#geom_extra_table_head_A 
#; 
#Table 2. 
#Molecular parameters deviating most from MOGUL averages 
#; 
# 
#loop_ 
#_geom_extra_tableA_col_1 
#_geom_extra_tableA_col_2 
#_geom_extra_tableA_col_3 
#_geom_extra_tableA_col_4 
# 
#Parameter "Observed Value" "MOGUL Value" "MOGUL e.s.d" 
#N5-C6-C4 129 124 "7 (\%)" 
#C3-O10-C2 105 109 "2 (\%)" 
#C6-O7 1.25 1.22 ".02 (\%A)" 
# 
# End of 'script/refcif-b.dat' 
#end of refcif 
_cell_length_a                    9.8737(3)
_cell_length_b                    11.1192(3)
_cell_length_c                    18.7391(5)
_cell_angle_alpha                 81.793(2)
_cell_angle_beta                  77.675(2)
_cell_angle_gamma                 83.556(2)
_cell_volume                      1982.20(10)
 
_symmetry_cell_setting            'Triclinic' 
_symmetry_space_group_name_H-M    'P -1 ' 
_symmetry_space_group_name_Hall   '-P 1' 
loop_
 _symmetry_equiv_pos_as_xyz
 'x,y,z'
 '-x,-y,-z'

loop_
_atom_type_symbol
_atom_type_scat_dispersion_real
_atom_type_scat_dispersion_imag
_atom_type_scat_Cromer_Mann_a1
_atom_type_scat_Cromer_Mann_b1
_atom_type_scat_Cromer_Mann_a2
_atom_type_scat_Cromer_Mann_b2
_atom_type_scat_Cromer_Mann_a3
_atom_type_scat_Cromer_Mann_b3
_atom_type_scat_Cromer_Mann_a4
_atom_type_scat_Cromer_Mann_b4
_atom_type_scat_Cromer_Mann_c
_atom_type_scat_source  
 C       0.0033   0.0016   2.3100  20.8439   1.0200  10.2075   1.5886   0.5687
   0.8650  51.6512   0.2156 'International Tables Vol C 4.2.6.8 and 6.1.1.4'
 H       0.0000   0.0000   0.4930  10.5109   0.3229  26.1257   0.1402   3.1424
   0.0408  57.7998   0.0030 'International Tables Vol C 4.2.6.8 and 6.1.1.4'
 N       0.0061   0.0033  12.2126   0.0057   3.1322   9.8933   2.0125  28.9975
   1.1663   0.5826 -11.5290 'International Tables Vol C 4.2.6.8 and 6.1.1.4'
 O       0.0106   0.0060   3.0485  13.2771   2.2868   5.7011   1.5463   0.3239
   0.8670  32.9089   0.2508 'International Tables Vol C 4.2.6.8 and 6.1.1.4'
 Zr     -2.9673   0.5597  17.8765   1.2762  10.9480  11.9160   5.4173   0.1176
   3.6572  87.6627   2.0693 'International Tables Vol C 4.2.6.8 and 6.1.1.4'
 
 
_cell_formula_units_Z                    2

# Given Formula = C36 H32 N12 O16 Zr1 
# Dc =      1.64 Fooo =   1000.00 Mu =      3.69 M =    979.94
# Found Formula = C36 H32 N12 O16 Zr1 
# Dc =      1.64 FOOO =   1000.00 Mu =      3.69 M =    979.94

_chemical_formula_sum             'C36 H32 N12 O16 Zr1'
_chemical_formula_moiety          'C8 O16 Zr, 4(C7 H8 N3)'
_chemical_compound_source                ?
_chemical_formula_weight            979.94
 
 
_cell_measurement_reflns_used        11625
_cell_measurement_theta_min              3
_cell_measurement_theta_max             29
_cell_measurement_temperature          180
 
_exptl_crystal_description        'block' 
_exptl_crystal_colour             'colorless' 
_exptl_crystal_size_min           0.10 
_exptl_crystal_size_mid           0.20 
_exptl_crystal_size_max           0.25 
 
_exptl_crystal_density_diffrn     1.642 
_exptl_crystal_density_meas       ? 
_exptl_crystal_density_method     'not measured' 
# Non-dispersive F(000): 
_exptl_crystal_F_000              1000 
_exptl_absorpt_coefficient_mu     0.369 
 
# Sheldrick geometric approximatio 0.93 0.96 
_exptl_absorpt_correction_type    multi-scan 
_exptl_absorpt_process_details    'Blessing, acta cryst. (1995), a51, 33-38' 
_exptl_absorpt_correction_T_min   0.94 
_exptl_absorpt_correction_T_max   0.96 
_diffrn_measurement_device        'Oxford Diffraction XCALIBUR' 
_diffrn_measurement_device_type   'Area' 
_diffrn_radiation_monochromator   'graphite' 
_diffrn_radiation_type            'Mo K\a'
_diffrn_radiation_wavelength           0.71073
_diffrn_measurement_method        '\f & \w scans' 
 
# If a reference occurs more than once, delete the author 
# and date from subsequent references. 
_computing_data_collection        'Xcalibur, (Oxford Diffraction, 2002)' 
_computing_cell_refinement        'CrysAlis RED, (Oxford Diffraction, 2002)' 
_computing_data_reduction         'CrysAlis RED, (Oxford Diffraction, 2002)' 
_computing_structure_solution     'SIR92 (Altomare et al., 1994)' 
_computing_structure_refinement   'CRYSTALS (Betteridge et al., 2003)' 
_computing_publication_material   'CRYSTALS (Betteridge et al., 2003)' 
_computing_molecular_graphics     'CAMERON (Watkin et al., 1996)' 
 
_diffrn_standards_interval_time   . 
_diffrn_standards_interval_count  . 
_diffrn_standards_number          0 
_diffrn_standards_decay_%         ? 
 
_diffrn_ambient_temperature        180
_diffrn_reflns_number             19169 
_reflns_number_total              10525 
_diffrn_reflns_av_R_equivalents   0.036 
# Number of reflections with Friedels Law is 10525 
# Number of reflections without Friedels Law is 0 
# Theoretical number of reflections is about 10628 
 
 
_diffrn_reflns_theta_min          2.659 
_diffrn_reflns_theta_max          29.087 
_diffrn_measured_fraction_theta_max 0.988 
 
_diffrn_reflns_theta_full         27.633 
_diffrn_measured_fraction_theta_full 0.996 
 
 
_diffrn_reflns_limit_h_min        -13 
_diffrn_reflns_limit_h_max        11 
_diffrn_reflns_limit_k_min        -14 
_diffrn_reflns_limit_k_max        15 
_diffrn_reflns_limit_l_min        -25 
_diffrn_reflns_limit_l_max        25 
_reflns_limit_h_min               -13 
_reflns_limit_h_max               13 
_reflns_limit_k_min               -14 
_reflns_limit_k_max               15 
_reflns_limit_l_min               0 
_reflns_limit_l_max               25 
 
_atom_sites_solution_primary      direct #heavy,direct,difmap,geom
# _atom_sites_solution_secondary  difmap
_atom_sites_solution_hydrogens    geom
 
_refine_diff_density_min          -0.49 
_refine_diff_density_max          0.53 
 
 
# The current dictionary definitions do not cover the 
# situation where the reflections used for refinement were 
# selected by a user-defined sigma threshold 
 
 
# The values actually used during refinement 
_oxford_reflns_threshold_expression_ref     I>3.0\s(I)
_refine_ls_number_reflns          7888 
_refine_ls_number_restraints      0 
_refine_ls_number_parameters      586 
_oxford_refine_ls_R_factor_ref    0.0298 
_refine_ls_wR_factor_ref          0.0317 
_refine_ls_goodness_of_fit_ref    1.1240 
_refine_ls_shift/su_max           0.002652 
 
 
# The values computed from all data 
_oxford_reflns_number_all         10498 
_refine_ls_R_factor_all           0.0452 
_refine_ls_wR_factor_all          0.0411 
 
# The values computed with a 2 sigma cutoff - a la SHELX 
_reflns_threshold_expression      I>2.0\s(I)
_reflns_number_gt                 8416 
_refine_ls_R_factor_gt            0.0318 
_refine_ls_wR_factor_gt           0.0329 
 
# choose from: rm (reference molecule of known chirality), 
# ad (anomolous dispersion - Flack), rmad (rm and ad), 
# syn (from synthesis), unk (unknown) or . (not applicable). 
_chemical_absolute_configuration  '.' 
 
 
_refine_ls_structure_factor_coef  F 
_refine_ls_matrix_type            full
_refine_ls_hydrogen_treatment     constr         # none, undef, noref, refall,
                                                 # refxyz, refU, constr or mixed
_refine_ls_weighting_scheme       calc 
_refine_ls_weighting_details 
;
 Method, part 1, Chebychev polynomial, (Watkin, 1994, Prince, 1982) 
 [weight] = 1.0/[A~0~*T~0~(x)+A~1~*T~1~(x) ... +A~n-1~]*T~n-1~(x)] 
 where A~i~ are the Chebychev coefficients listed below and x= Fcalc/Fmax 
 Method = Robust Weighting (Prince, 1982) 
 W = [weight] * [1-(deltaF/6*sigmaF)^2^]^2^ 
 A~i~ are: 
 2.44 -0.507 1.37 
;
# Insert your own references if required - in alphabetical order 
_publ_section_references 
; 
Altomare, A., Cascarano, G., Giacovazzo, C., Guagliardi, A., Burla, M.C., 
Polidori, G. & Camalli, M. (1994). J. Appl. Cryst. 27, 435. 
 
Betteridge, P.W., Carruthers, J.R., Cooper, R.I., 
Prout, K. & Watkin, D.J. (2003). J. Appl. Cryst. 36, 1487. 
 
Otwinowski, Z. & Minor, W. (1997). Methods in Enzymology, Vol. 276, 
edited by C. W. Carter Jr & R. M. Sweet, pp. 307--326. 
New York: Academic Press. 
 
Oxford Diffraction, (2002). CrysAlis RED. 
 
Oxford Diffraction, (2002). Xcalibur User Manual. 
 
Prince, E. 
Mathematical Techniques in Crystallography 
and Materials Science 
Springer-Verlag, New York, 1982. 
 
Watkin D.J. (1994). 
Acta Cryst, A50, 411-437. 
 
Watkin, D.J., Prout, C.K. & Pearce, L.J. (1996). CAMERON, Chemical 
Crystallography Laboratory, Oxford, UK. 
; 

# Uequiv = arithmetic mean of Ui i.e. Ueqiv = (U1+U2+U3)/3

# Replace last . with number of unfound hydrogen atomsattached to an atom.

# ..._refinement_flags_... 
# . no refinement constraints           S special position constraint on site
# G rigid group refinement of site      R riding atom
# D distance or angle restraint on site T thermal displacement constraints
# U Uiso or Uij restraint (rigid bond)  P partial occupancy constraint


loop_
_atom_site_label
_atom_site_type_symbol
_atom_site_fract_x
_atom_site_fract_y
_atom_site_fract_z
_atom_site_U_iso_or_equiv
_atom_site_occupancy
_atom_site_adp_type
_atom_site_refinement_flags_posn
_atom_site_refinement_flags_adp
_atom_site_refinement_flags_occupancy
_atom_site_disorder_assembly
_atom_site_disorder_group
_oxford_atom_site_special_shape
_atom_site_attached_hydrogens
N1 N 0.73566(19) 0.44928(15) 0.76822(9) 0.0310 1.0000 Uani . . . . . . . 
N2 N 0.64845(16) 0.32134(13) 0.87672(9) 0.0244 1.0000 Uani . . . . . . . 
N3 N 0.71897(16) 0.49444(13) 0.88939(9) 0.0234 1.0000 Uani . . . . . . . 
N4 N 0.74222(18) -0.07254(16) 0.94060(9) 0.0315 1.0000 Uani . . . . . . . 
N5 N 0.87994(17) 0.09115(15) 0.89187(8) 0.0272 1.0000 Uani . . . . . . . 
N6 N 0.83065(16) 0.04743(15) 1.01168(8) 0.0254 1.0000 Uani . . . . . . . 
N7 N 0.8096(2) 0.62009(17) 0.50984(10) 0.0347 1.0000 Uani . . . . . . . 
N8 N 0.78040(17) 0.66366(15) 0.38704(9) 0.0257 1.0000 Uani . . . . . . . 
N9 N 0.69021(17) 0.50208(14) 0.45163(8) 0.0254 1.0000 Uani . . . . . . . 
N10 N 0.63044(18) -0.10756(16) 0.50977(9) 0.0307 1.0000 Uani . . . . . . . 
N11 N 0.77763(17) 0.05251(15) 0.47761(9) 0.0273 1.0000 Uani . . . . . . . 
N12 N 0.68565(17) 0.00287(16) 0.39106(9) 0.0276 1.0000 Uani . . . . . . . 
C9 C 0.70271(19) 0.42319(15) 0.84036(10) 0.0235 1.0000 Uani . . . . . . . 
C10 C 0.62879(18) 0.32652(16) 0.95173(10) 0.0226 1.0000 Uani . . . . . . . 
C11 C 0.57552(19) 0.24651(17) 1.01184(11) 0.0278 1.0000 Uani . . . . . . . 
C12 C 0.5718(2) 0.2805(2) 1.08071(12) 0.0341 1.0000 Uani . . . . . . . 
C13 C 0.6180(2) 0.3904(2) 1.08845(12) 0.0343 1.0000 Uani . . . . . . . 
C14 C 0.6690(2) 0.47148(18) 1.02817(11) 0.0290 1.0000 Uani . . . . . . . 
C15 C 0.67349(18) 0.43694(16) 0.95984(10) 0.0225 1.0000 Uani . . . . . . . 
C16 C 0.81361(19) 0.01632(18) 0.94776(10) 0.0246 1.0000 Uani . . . . . . . 
C17 C 0.93762(19) 0.17713(18) 0.92046(10) 0.0264 1.0000 Uani . . . . . . . 
C18 C 1.0098(2) 0.2760(2) 0.88672(12) 0.0342 1.0000 Uani . . . . . . . 
C19 C 1.0499(2) 0.3462(2) 0.93253(14) 0.0404 1.0000 Uani . . . . . . . 
C20 C 1.0191(2) 0.3188(2) 1.00878(14) 0.0409 1.0000 Uani . . . . . . . 
C21 C 0.9466(2) 0.2197(2) 1.04232(12) 0.0343 1.0000 Uani . . . . . . . 
C22 C 0.90645(19) 0.14943(18) 0.99667(10) 0.0262 1.0000 Uani . . . . . . . 
C23 C 0.76209(19) 0.59657(17) 0.45294(10) 0.0249 1.0000 Uani . . . . . . . 
C24 C 0.71690(19) 0.61075(16) 0.34095(10) 0.0233 1.0000 Uani . . . . . . . 
C25 C 0.7035(2) 0.64530(18) 0.26907(10) 0.0278 1.0000 Uani . . . . . . . 
C26 C 0.6307(2) 0.5716(2) 0.23971(11) 0.0322 1.0000 Uani . . . . . . . 
C27 C 0.5749(2) 0.4683(2) 0.28112(11) 0.0331 1.0000 Uani . . . . . . . 
C28 C 0.5881(2) 0.43406(18) 0.35330(11) 0.0299 1.0000 Uani . . . . . . . 
C29 C 0.65972(19) 0.50777(16) 0.38235(10) 0.0235 1.0000 Uani . . . . . . . 
C30 C 0.69347(19) -0.02261(18) 0.46231(10) 0.0255 1.0000 Uani . . . . . . . 
C31 C 0.82557(19) 0.12970(19) 0.41428(11) 0.0275 1.0000 Uani . . . . . . . 
C32 C 0.9126(2) 0.2224(2) 0.40170(12) 0.0343 1.0000 Uani . . . . . . . 
C33 C 0.9404(2) 0.2823(2) 0.33095(13) 0.0398 1.0000 Uani . . . . . . . 
C34 C 0.8845(2) 0.2493(2) 0.27534(13) 0.0415 1.0000 Uani . . . . . . . 
C35 C 0.7970(2) 0.1561(2) 0.28801(12) 0.0372 1.0000 Uani . . . . . . . 
C36 C 0.7678(2) 0.09804(19) 0.35882(11) 0.0282 1.0000 Uani . . . . . . . 
C1 C 0.4579(2) 0.10258(16) 0.85245(10) 0.0240 1.0000 Uani . . . . . . . 
C2 C 0.38304(19) 0.02909(16) 0.81125(9) 0.0220 1.0000 Uani . . . . . . . 
C3 C 0.57794(18) 0.23261(15) 0.58593(9) 0.0197 1.0000 Uani . . . . . . . 
C4 C 0.65243(18) 0.30917(15) 0.62559(9) 0.0211 1.0000 Uani . . . . . . . 
C5 C 0.94635(18) 0.13203(15) 0.62043(9) 0.0200 1.0000 Uani . . . . . . . 
C6 C 0.95590(19) 0.13658(16) 0.70099(9) 0.0219 1.0000 Uani . . . . . . . 
C7 C 0.71013(18) -0.20974(16) 0.69217(10) 0.0229 1.0000 Uani . . . . . . . 
C8 C 0.73382(19) -0.20370(16) 0.77016(10) 0.0238 1.0000 Uani . . . . . . . 
O1 O 0.58046(13) 0.12663(11) 0.81715(7) 0.0223 1.0000 Uani . . . . . . . 
O2 O 0.45281(13) 0.01084(12) 0.74721(7) 0.0248 1.0000 Uani . . . . . . . 
O3 O 0.40204(17) 0.13369(16) 0.91173(8) 0.0406 1.0000 Uani . . . . . . . 
O4 O 0.26925(15) -0.00500(15) 0.84011(7) 0.0331 1.0000 Uani . . . . . . . 
O5 O 0.55997(13) 0.12479(11) 0.61946(7) 0.0209 1.0000 Uani . . . . . . . 
O6 O 0.66776(14) 0.25820(11) 0.68957(7) 0.0227 1.0000 Uani . . . . . . . 
O7 O 0.54322(14) 0.27505(12) 0.52813(7) 0.0264 1.0000 Uani . . . . . . . 
O8 O 0.69162(16) 0.40742(12) 0.59636(8) 0.0316 1.0000 Uani . . . . . . . 
O9 O 0.83816(13) 0.08285(11) 0.61451(7) 0.0219 1.0000 Uani . . . . . . . 
O10 O 0.85115(13) 0.09422(12) 0.74774(7) 0.0242 1.0000 Uani . . . . . . . 
O11 O 1.03524(14) 0.17345(13) 0.57025(7) 0.0273 1.0000 Uani . . . . . . . 
O12 O 1.05381(15) 0.17727(14) 0.71563(8) 0.0323 1.0000 Uani . . . . . . . 
O13 O 0.68081(14) -0.10392(11) 0.65824(7) 0.0233 1.0000 Uani . . . . . . . 
O14 O 0.70786(14) -0.09699(11) 0.79052(7) 0.0245 1.0000 Uani . . . . . . . 
O15 O 0.71849(17) -0.30713(12) 0.66874(8) 0.0339 1.0000 Uani . . . . . . . 
O16 O 0.77352(17) -0.29484(13) 0.80692(8) 0.0368 1.0000 Uani . . . . . . . 
Zr1 Zr 0.665324(17) 0.060093(15) 0.710930(9) 0.0158 1.0000 Uani . . . . . . . 
H111 H 0.5443 0.1712 1.0058 0.0333 1.0000 Uiso R . . . . . . 
H121 H 0.5376 0.2275 1.1237 0.0397 1.0000 Uiso R . . . . . . 
H131 H 0.6144 0.4107 1.1367 0.0418 1.0000 Uiso R . . . . . . 
H141 H 0.6983 0.5484 1.0338 0.0359 1.0000 Uiso R . . . . . . 
H181 H 1.0315 0.2942 0.8342 0.0414 1.0000 Uiso R . . . . . . 
H191 H 1.0999 0.4150 0.9112 0.0499 1.0000 Uiso R . . . . . . 
H201 H 1.0483 0.3707 1.0381 0.0508 1.0000 Uiso R . . . . . . 
H211 H 0.9242 0.1991 1.0942 0.0428 1.0000 Uiso R . . . . . . 
H251 H 0.7414 0.7167 0.2416 0.0338 1.0000 Uiso R . . . . . . 
H261 H 0.6198 0.5926 0.1898 0.0391 1.0000 Uiso R . . . . . . 
H271 H 0.5243 0.4193 0.2595 0.0406 1.0000 Uiso R . . . . . . 
H281 H 0.5500 0.3640 0.3816 0.0375 1.0000 Uiso R . . . . . . 
H321 H 0.9512 0.2439 0.4398 0.0440 1.0000 Uiso R . . . . . . 
H331 H 0.9987 0.3481 0.3208 0.0484 1.0000 Uiso R . . . . . . 
H341 H 0.9067 0.2924 0.2264 0.0505 1.0000 Uiso R . . . . . . 
H351 H 0.7583 0.1337 0.2503 0.0454 1.0000 Uiso R . . . . . . 
H122 H 0.6309 -0.0308 0.3700 0.0361 1.0000 Uiso R . . . . . . 
H81 H 0.8300 0.7278 0.3742 0.0324 1.0000 Uiso R . . . . . . 
H101 H 0.5729 -0.1538 0.4972 0.0386 1.0000 Uiso R . . . . . . 
H12 H 0.7582 0.5233 0.7494 0.0393 1.0000 Uiso R . . . . . . 
H41 H 0.7052 -0.1184 0.9801 0.0393 1.0000 Uiso R . . . . . . 
H21 H 0.6290 0.2611 0.8560 0.0316 1.0000 Uiso R . . . . . . 
H31 H 0.7495 0.5674 0.8777 0.0304 1.0000 Uiso R . . . . . . 
H42 H 0.7353 -0.0863 0.8971 0.0394 1.0000 Uiso R . . . . . . 
H61 H 0.7962 0.0114 1.0564 0.0324 1.0000 Uiso R . . . . . . 
H71 H 0.7891 0.5752 0.5519 0.0438 1.0000 Uiso R . . . . . . 
H72 H 0.8519 0.6861 0.5056 0.0438 1.0000 Uiso R . . . . . . 
H91 H 0.6644 0.4480 0.4905 0.0326 1.0000 Uiso R . . . . . . 
H112 H 0.7968 0.0539 0.5210 0.0356 1.0000 Uiso R . . . . . . 
H102 H 0.6423 -0.1188 0.5549 0.0387 1.0000 Uiso R . . . . . . 
H51 H 0.8815 0.0886 0.8446 0.0339 1.0000 Uiso R . . . . . . 
H11 H 0.7223 0.3961 0.7408 0.0390 1.0000 Uiso R . . . . . . 
loop_
_atom_site_aniso_label
_atom_site_aniso_U_11
_atom_site_aniso_U_22
_atom_site_aniso_U_33
_atom_site_aniso_U_23
_atom_site_aniso_U_13
_atom_site_aniso_U_12
N1 0.0443(10) 0.0239(8) 0.0282(8) -0.0024(6) -0.0123(7) -0.0086(7) 
N2 0.0284(8) 0.0165(7) 0.0309(8) -0.0039(6) -0.0092(6) -0.0052(6) 
N3 0.0284(8) 0.0166(6) 0.0271(8) -0.0037(6) -0.0079(6) -0.0046(6) 
N4 0.0351(9) 0.0389(9) 0.0198(7) 0.0000(7) -0.0048(7) -0.0061(7) 
N5 0.0279(8) 0.0357(9) 0.0163(7) -0.0002(6) -0.0032(6) -0.0012(6) 
N6 0.0237(7) 0.0342(8) 0.0163(7) -0.0016(6) -0.0030(6) 0.0029(6) 
N7 0.0452(10) 0.0347(9) 0.0278(8) 0.0044(7) -0.0140(8) -0.0163(8) 
N8 0.0271(8) 0.0270(8) 0.0231(7) 0.0027(6) -0.0046(6) -0.0104(6) 
N9 0.0307(8) 0.0238(7) 0.0207(7) 0.0021(6) -0.0033(6) -0.0079(6) 
N10 0.0324(9) 0.0364(9) 0.0260(8) -0.0063(7) -0.0089(7) -0.0057(7) 
N11 0.0258(8) 0.0361(9) 0.0230(7) -0.0127(6) -0.0061(6) -0.0018(6) 
N12 0.0250(8) 0.0374(9) 0.0238(8) -0.0109(6) -0.0060(6) -0.0059(6) 
C9 0.0240(8) 0.0176(8) 0.0310(9) -0.0035(7) -0.0103(7) -0.0011(6) 
C10 0.0191(8) 0.0183(8) 0.0311(9) -0.0034(7) -0.0077(7) 0.0013(6) 
C11 0.0205(8) 0.0235(9) 0.0372(10) 0.0016(7) -0.0050(7) -0.0013(7) 
C12 0.0290(10) 0.0357(11) 0.0314(10) 0.0029(8) 0.0009(8) 0.0010(8) 
C13 0.0326(10) 0.0415(11) 0.0272(10) -0.0078(8) -0.0030(8) 0.0028(9) 
C14 0.0275(9) 0.0295(9) 0.0310(10) -0.0093(8) -0.0056(8) -0.0009(7) 
C15 0.0212(8) 0.0195(8) 0.0274(9) -0.0030(6) -0.0068(7) -0.0001(6) 
C16 0.0212(8) 0.0329(9) 0.0173(8) -0.0014(7) -0.0032(6) 0.0052(7) 
C17 0.0202(8) 0.0338(10) 0.0227(8) -0.0018(7) -0.0025(7) 0.0025(7) 
C18 0.0239(9) 0.0446(12) 0.0317(10) -0.0012(9) -0.0018(8) -0.0036(8) 
C19 0.0267(10) 0.0451(13) 0.0494(13) -0.0044(10) -0.0066(9) -0.0071(9) 
C20 0.0300(11) 0.0493(13) 0.0479(13) -0.0186(11) -0.0099(10) -0.0018(9) 
C21 0.0273(10) 0.0466(12) 0.0294(10) -0.0121(9) -0.0056(8) 0.0039(9) 
C22 0.0202(8) 0.0349(10) 0.0220(8) -0.0044(7) -0.0039(7) 0.0051(7) 
C23 0.0246(9) 0.0253(9) 0.0241(8) 0.0004(7) -0.0051(7) -0.0027(7) 
C24 0.0219(8) 0.0242(8) 0.0217(8) 0.0001(6) -0.0001(6) -0.0049(6) 
C25 0.0261(9) 0.0306(9) 0.0231(9) 0.0027(7) -0.0002(7) -0.0041(7) 
C26 0.0333(10) 0.0408(11) 0.0216(9) -0.0046(8) -0.0039(8) -0.0007(8) 
C27 0.0342(10) 0.0386(11) 0.0297(10) -0.0110(8) -0.0075(8) -0.0062(8) 
C28 0.0331(10) 0.0268(9) 0.0293(9) -0.0031(7) -0.0024(8) -0.0084(8) 
C29 0.0245(8) 0.0224(8) 0.0214(8) -0.0004(6) -0.0012(7) -0.0029(7) 
C30 0.0208(8) 0.0323(9) 0.0245(8) -0.0120(7) -0.0034(7) 0.0019(7) 
C31 0.0225(9) 0.0368(10) 0.0251(9) -0.0137(8) -0.0036(7) 0.0000(7) 
C32 0.0256(9) 0.0450(12) 0.0361(11) -0.0155(9) -0.0055(8) -0.0064(8) 
C33 0.0295(10) 0.0487(13) 0.0420(12) -0.0115(10) -0.0003(9) -0.0132(9) 
C34 0.0392(12) 0.0551(14) 0.0292(10) -0.0059(10) 0.0005(9) -0.0133(10) 
C35 0.0363(11) 0.0530(13) 0.0257(10) -0.0113(9) -0.0059(8) -0.0104(10) 
C36 0.0231(9) 0.0378(10) 0.0260(9) -0.0142(8) -0.0027(7) -0.0037(7) 
C1 0.0280(9) 0.0243(8) 0.0188(8) -0.0020(6) -0.0011(7) -0.0066(7) 
C2 0.0239(8) 0.0233(8) 0.0185(8) 0.0004(6) -0.0038(6) -0.0055(6) 
C3 0.0205(8) 0.0207(8) 0.0167(7) -0.0027(6) -0.0007(6) -0.0017(6) 
C4 0.0249(8) 0.0187(8) 0.0189(8) -0.0018(6) -0.0024(6) -0.0020(6) 
C5 0.0214(8) 0.0191(8) 0.0191(8) -0.0024(6) -0.0031(6) -0.0018(6) 
C6 0.0246(8) 0.0221(8) 0.0188(8) 0.0026(6) -0.0052(6) -0.0062(6) 
C7 0.0222(8) 0.0199(8) 0.0253(8) -0.0025(6) 0.0005(7) -0.0070(6) 
C8 0.0248(8) 0.0187(8) 0.0249(8) 0.0025(6) 0.0011(7) -0.0073(6) 
O1 0.0271(6) 0.0218(6) 0.0186(6) -0.0043(5) -0.0005(5) -0.0093(5) 
O2 0.0248(6) 0.0337(7) 0.0161(6) -0.0050(5) 0.0007(5) -0.0108(5) 
O3 0.0425(9) 0.0556(10) 0.0244(7) -0.0180(7) 0.0090(6) -0.0204(7) 
O4 0.0271(7) 0.0521(9) 0.0211(6) -0.0060(6) 0.0006(5) -0.0163(6) 
O5 0.0243(6) 0.0201(6) 0.0191(6) 0.0003(4) -0.0053(5) -0.0068(5) 
O6 0.0343(7) 0.0175(6) 0.0172(6) -0.0020(4) -0.0060(5) -0.0051(5) 
O7 0.0333(7) 0.0272(6) 0.0188(6) 0.0023(5) -0.0082(5) -0.0037(5) 
O8 0.0465(8) 0.0219(6) 0.0280(7) 0.0034(5) -0.0105(6) -0.0120(6) 
O9 0.0222(6) 0.0269(6) 0.0175(6) -0.0050(5) -0.0013(5) -0.0083(5) 
O10 0.0250(6) 0.0305(7) 0.0172(6) 0.0028(5) -0.0044(5) -0.0103(5) 
O11 0.0253(6) 0.0338(7) 0.0212(6) -0.0014(5) 0.0021(5) -0.0109(5) 
O12 0.0306(7) 0.0451(8) 0.0244(7) 0.0011(6) -0.0078(6) -0.0196(6) 
O13 0.0313(7) 0.0191(6) 0.0204(6) -0.0036(5) -0.0044(5) -0.0056(5) 
O14 0.0362(7) 0.0190(6) 0.0186(6) 0.0000(5) -0.0066(5) -0.0046(5) 
O15 0.0458(9) 0.0204(6) 0.0372(8) -0.0082(6) -0.0068(7) -0.0077(6) 
O16 0.0475(9) 0.0236(7) 0.0339(8) 0.0083(6) -0.0039(7) -0.0028(6) 
Zr1 0.01985(8) 0.01531(7) 0.01241(7) -0.00096(5) -0.00224(5) -0.00567(5) 

_refine_ls_extinction_method 
    'None'

loop_
 _geom_bond_atom_site_label_1
 _geom_bond_site_symmetry_1
 _geom_bond_atom_site_label_2
 _geom_bond_site_symmetry_2
 _geom_bond_distance
 _geom_bond_publ_flag
N1 . C9 . 1.319(2)    yes
N1 . H12 . 0.881    no
N1 . H11 . 0.874    no
N2 . C9 . 1.339(2)    yes
N2 . C10 . 1.386(2)    yes
N2 . H21 . 0.878    no
N3 . C9 . 1.340(2)    yes
N3 . C15 . 1.387(2)    yes
N3 . H31 . 0.879    no
N4 . C16 . 1.314(3)    yes
N4 . H41 . 0.871    no
N4 . H42 . 0.869    no
N5 . C16 . 1.341(2)    yes
N5 . C17 . 1.387(3)    yes
N5 . H51 . 0.888    no
N6 . C16 . 1.342(2)    yes
N6 . C22 . 1.391(3)    yes
N6 . H61 . 0.889    no
N7 . C23 . 1.321(2)    yes
N7 . H71 . 0.868    no
N7 . H72 . 0.870    no
N8 . C23 . 1.336(2)    yes
N8 . C24 . 1.394(2)    yes
N8 . H81 . 0.887    no
N9 . C23 . 1.338(2)    yes
N9 . C29 . 1.385(2)    yes
N9 . H91 . 0.887    no
N10 . C30 . 1.314(3)    yes
N10 . H101 . 0.894    no
N10 . H102 . 0.868    no
N11 . C30 . 1.340(2)    yes
N11 . C31 . 1.389(3)    yes
N11 . H112 . 0.876    no
N12 . C30 . 1.342(2)    yes
N12 . C36 . 1.394(3)    yes
N12 . H122 . 0.876    no
C10 . C11 . 1.379(3)    yes
C10 . C15 . 1.389(2)    yes
C11 . C12 . 1.388(3)    yes
C11 . H111 . 0.953    no
C12 . C13 . 1.388(3)    yes
C12 . H121 . 0.951    no
C13 . C14 . 1.382(3)    yes
C13 . H131 . 0.954    no
C14 . C15 . 1.379(3)    yes
C14 . H141 . 0.959    no
C17 . C18 . 1.379(3)    yes
C17 . C22 . 1.392(3)    yes
C18 . C19 . 1.382(3)    yes
C18 . H181 . 0.958    no
C19 . C20 . 1.392(3)    yes
C19 . H191 . 0.950    no
C20 . C21 . 1.381(3)    yes
C20 . H201 . 0.956    no
C21 . C22 . 1.380(3)    yes
C21 . H211 . 0.951    no
C24 . C25 . 1.377(3)    yes
C24 . C29 . 1.391(2)    yes
C25 . C26 . 1.386(3)    yes
C25 . H251 . 0.950    no
C26 . C27 . 1.390(3)    yes
C26 . H261 . 0.956    no
C27 . C28 . 1.381(3)    yes
C27 . H271 . 0.959    no
C28 . C29 . 1.375(3)    yes
C28 . H281 . 0.945    no
C31 . C32 . 1.378(3)    yes
C31 . C36 . 1.390(3)    yes
C32 . C33 . 1.382(3)    yes
C32 . H321 . 0.947    no
C33 . C34 . 1.387(3)    yes
C33 . H331 . 0.955    no
C34 . C35 . 1.386(3)    yes
C34 . H341 . 0.964    no
C35 . C36 . 1.376(3)    yes
C35 . H351 . 0.947    no
C1 . C2 . 1.539(2)    yes
C1 . O1 . 1.286(2)    yes
C1 . O3 . 1.210(2)    yes
C2 . O2 . 1.281(2)    yes
C2 . O4 . 1.215(2)    yes
C3 . C4 . 1.540(2)    yes
C3 . O5 . 1.284(2)    yes
C3 . O7 . 1.221(2)    yes
C4 . O6 . 1.283(2)    yes
C4 . O8 . 1.215(2)    yes
C5 . C6 . 1.541(2)    yes
C5 . O9 . 1.285(2)    yes
C5 . O11 . 1.217(2)    yes
C6 . O10 . 1.290(2)    yes
C6 . O12 . 1.209(2)    yes
C7 . C8 . 1.540(3)    yes
C7 . O13 . 1.289(2)    yes
C7 . O15 . 1.213(2)    yes
C8 . O14 . 1.280(2)    yes
C8 . O16 . 1.217(2)    yes
O1 . Zr1 . 2.1865(12)    yes
O2 . Zr1 . 2.1697(13)    yes
O5 . Zr1 . 2.1861(12)    yes
O6 . Zr1 . 2.1838(12)    yes
O9 . Zr1 . 2.2116(12)    yes
O10 . Zr1 . 2.1812(12)    yes
O13 . Zr1 . 2.1705(12)    yes
O14 . Zr1 . 2.1933(12)    yes
loop_
 _geom_angle_atom_site_label_1
 _geom_angle_site_symmetry_1
 _geom_angle_atom_site_label_2
 _geom_angle_site_symmetry_2
 _geom_angle_atom_site_label_3
 _geom_angle_site_symmetry_3
 _geom_angle
 _geom_angle_publ_flag
C9 . N1 . H12 . 119.0    no
C9 . N1 . H11 . 118.5    no
H12 . N1 . H11 . 121.8    no
C9 . N2 . C10 . 109.09(15)    yes
C9 . N2 . H21 . 125.1    no
C10 . N2 . H21 . 125.8    no
C9 . N3 . C15 . 109.01(15)    yes
C9 . N3 . H31 . 124.4    no
C15 . N3 . H31 . 126.6    no
C16 . N4 . H41 . 118.6    no
C16 . N4 . H42 . 120.0    no
H41 . N4 . H42 . 121.4    no
C16 . N5 . C17 . 108.79(16)    yes
C16 . N5 . H51 . 125.2    no
C17 . N5 . H51 . 125.9    no
C16 . N6 . C22 . 108.53(15)    yes
C16 . N6 . H61 . 126.1    no
C22 . N6 . H61 . 125.3    no
C23 . N7 . H71 . 119.8    no
C23 . N7 . H72 . 118.6    no
H71 . N7 . H72 . 121.2    no
C23 . N8 . C24 . 108.57(15)    yes
C23 . N8 . H81 . 125.3    no
C24 . N8 . H81 . 126.0    no
C23 . N9 . C29 . 108.96(15)    yes
C23 . N9 . H91 . 123.6    no
C29 . N9 . H91 . 127.4    no
C30 . N10 . H101 . 121.6    no
C30 . N10 . H102 . 120.2    no
H101 . N10 . H102 . 118.1    no
C30 . N11 . C31 . 109.02(16)    yes
C30 . N11 . H112 . 125.1    no
C31 . N11 . H112 . 125.8    no
C30 . N12 . C36 . 109.13(16)    yes
C30 . N12 . H122 . 124.5    no
C36 . N12 . H122 . 126.2    no
N3 . C9 . N2 . 108.79(16)    yes
N3 . C9 . N1 . 125.38(17)    yes
N2 . C9 . N1 . 125.83(17)    yes
N2 . C10 . C11 . 131.89(17)    yes
N2 . C10 . C15 . 106.55(16)    yes
C11 . C10 . C15 . 121.56(18)    yes
C10 . C11 . C12 . 116.74(18)    yes
C10 . C11 . H111 . 121.1    no
C12 . C11 . H111 . 122.2    no
C11 . C12 . C13 . 121.42(19)    yes
C11 . C12 . H121 . 119.7    no
C13 . C12 . H121 . 118.9    no
C12 . C13 . C14 . 121.8(2)    yes
C12 . C13 . H131 . 119.2    no
C14 . C13 . H131 . 119.0    no
C13 . C14 . C15 . 116.61(18)    yes
C13 . C14 . H141 . 121.4    no
C15 . C14 . H141 . 121.9    no
C10 . C15 . N3 . 106.55(16)    yes
C10 . C15 . C14 . 121.88(18)    yes
N3 . C15 . C14 . 131.56(17)    yes
N6 . C16 . N5 . 109.31(17)    yes
N6 . C16 . N4 . 125.66(17)    yes
N5 . C16 . N4 . 125.03(17)    yes
N5 . C17 . C18 . 131.48(18)    yes
N5 . C17 . C22 . 106.63(17)    yes
C18 . C17 . C22 . 121.87(19)    yes
C17 . C18 . C19 . 116.5(2)    yes
C17 . C18 . H181 . 121.5    no
C19 . C18 . H181 . 122.0    no
C18 . C19 . C20 . 121.9(2)    yes
C18 . C19 . H191 . 118.9    no
C20 . C19 . H191 . 119.3    no
C19 . C20 . C21 . 121.4(2)    yes
C19 . C20 . H201 . 118.6    no
C21 . C20 . H201 . 120.0    no
C20 . C21 . C22 . 116.8(2)    yes
C20 . C21 . H211 . 123.0    no
C22 . C21 . H211 . 120.2    no
C17 . C22 . N6 . 106.69(17)    yes
C17 . C22 . C21 . 121.5(2)    yes
N6 . C22 . C21 . 131.74(18)    yes
N9 . C23 . N8 . 109.39(16)    yes
N9 . C23 . N7 . 125.83(17)    yes
N8 . C23 . N7 . 124.77(17)    yes
N8 . C24 . C25 . 131.49(17)    yes
N8 . C24 . C29 . 106.52(16)    yes
C25 . C24 . C29 . 121.98(18)    yes
C24 . C25 . C26 . 116.50(18)    yes
C24 . C25 . H251 . 121.3    no
C26 . C25 . H251 . 122.2    no
C25 . C26 . C27 . 121.27(18)    yes
C25 . C26 . H261 . 118.8    no
C27 . C26 . H261 . 119.9    no
C26 . C27 . C28 . 122.08(19)    yes
C26 . C27 . H271 . 119.5    no
C28 . C27 . H271 . 118.4    no
C27 . C28 . C29 . 116.47(18)    yes
C27 . C28 . H281 . 122.3    no
C29 . C28 . H281 . 121.3    no
C24 . C29 . N9 . 106.55(16)    yes
C24 . C29 . C28 . 121.69(17)    yes
N9 . C29 . C28 . 131.75(17)    yes
N12 . C30 . N11 . 108.82(17)    yes
N12 . C30 . N10 . 126.15(18)    yes
N11 . C30 . N10 . 125.02(18)    yes
N11 . C31 . C32 . 131.31(18)    yes
N11 . C31 . C36 . 106.84(17)    yes
C32 . C31 . C36 . 121.85(19)    yes
C31 . C32 . C33 . 116.70(19)    yes
C31 . C32 . H321 . 121.5    no
C33 . C32 . H321 . 121.8    no
C32 . C33 . C34 . 121.4(2)    yes
C32 . C33 . H331 . 118.6    no
C34 . C33 . H331 . 119.9    no
C33 . C34 . C35 . 121.9(2)    yes
C33 . C34 . H341 . 119.4    no
C35 . C34 . H341 . 118.8    no
C34 . C35 . C36 . 116.5(2)    yes
C34 . C35 . H351 . 122.1    no
C36 . C35 . H351 . 121.4    no
N12 . C36 . C31 . 106.18(17)    yes
N12 . C36 . C35 . 132.18(18)    yes
C31 . C36 . C35 . 121.63(19)    yes
C2 . C1 . O1 . 113.29(15)    yes
C2 . C1 . O3 . 121.16(17)    yes
O1 . C1 . O3 . 125.55(17)    yes
C1 . C2 . O2 . 113.15(15)    yes
C1 . C2 . O4 . 120.01(16)    yes
O2 . C2 . O4 . 126.84(17)    yes
C4 . C3 . O5 . 113.24(14)    yes
C4 . C3 . O7 . 120.54(15)    yes
O5 . C3 . O7 . 126.22(16)    yes
C3 . C4 . O6 . 113.42(14)    yes
C3 . C4 . O8 . 120.84(16)    yes
O6 . C4 . O8 . 125.74(17)    yes
C6 . C5 . O9 . 112.97(14)    yes
C6 . C5 . O11 . 120.34(16)    yes
O9 . C5 . O11 . 126.69(16)    yes
C5 . C6 . O10 . 113.09(15)    yes
C5 . C6 . O12 . 120.84(16)    yes
O10 . C6 . O12 . 126.07(17)    yes
C8 . C7 . O13 . 112.88(15)    yes
C8 . C7 . O15 . 120.52(17)    yes
O13 . C7 . O15 . 126.60(18)    yes
C7 . C8 . O14 . 113.83(15)    yes
C7 . C8 . O16 . 120.74(17)    yes
O14 . C8 . O16 . 125.43(18)    yes
C1 . O1 . Zr1 . 120.30(11)    yes
C2 . O2 . Zr1 . 121.04(11)    yes
C3 . O5 . Zr1 . 118.66(11)    yes
C4 . O6 . Zr1 . 117.33(10)    yes
C5 . O9 . Zr1 . 119.22(11)    yes
C6 . O10 . Zr1 . 120.35(11)    yes
C7 . O13 . Zr1 . 121.05(11)    yes
C8 . O14 . Zr1 . 119.80(11)    yes
O9 . Zr1 . O14 . 112.51(5)    yes
O9 . Zr1 . O1 . 141.65(4)    yes
O14 . Zr1 . O1 . 76.78(5)    yes
O9 . Zr1 . O5 . 76.34(5)    yes
O14 . Zr1 . O5 . 144.77(5)    yes
O1 . Zr1 . O5 . 118.41(5)    yes
O9 . Zr1 . O6 . 77.97(5)    yes
O14 . Zr1 . O6 . 142.40(5)    yes
O1 . Zr1 . O6 . 74.54(5)    yes
O5 . Zr1 . O6 . 71.81(5)    yes
O9 . Zr1 . O10 . 70.93(5)    yes
O14 . Zr1 . O10 . 73.61(5)    yes
O1 . Zr1 . O10 . 77.04(5)    yes
O5 . Zr1 . O10 . 138.31(5)    yes
O6 . Zr1 . O10 . 76.64(5)    yes
O9 . Zr1 . O13 . 74.85(5)    yes
O14 . Zr1 . O13 . 71.90(5)    yes
O1 . Zr1 . O13 . 140.07(5)    yes
O5 . Zr1 . O13 . 78.39(5)    yes
O6 . Zr1 . O13 . 143.49(5)    yes
O9 . Zr1 . O2 . 144.15(5)    yes
O14 . Zr1 . O2 . 82.98(5)    yes
O1 . Zr1 . O2 . 71.74(5)    yes
O5 . Zr1 . O2 . 73.61(5)    yes
O6 . Zr1 . O2 . 110.01(5)    yes
O10 . Zr1 . O13 . 115.78(5)    yes
O10 . Zr1 . O2 . 144.46(5)    yes
O13 . Zr1 . O2 . 80.33(5)    yes
loop_
 _geom_hbond_atom_site_label_D
 _geom_hbond_site_symmetry_D
 _geom_hbond_atom_site_label_H
 _geom_hbond_site_symmetry_H
 _geom_hbond_atom_site_label_A
 _geom_hbond_site_symmetry_A
 _geom_hbond_angle_DHA
 _geom_hbond_distance_DH
 _geom_hbond_distance_HA
 _geom_hbond_distance_DA
 _geom_hbond_publ_flag
C11 . H111 . O3 . 127 0.95 2.58 3.249(3)    yes
C35 . H351 . O4 2_656 156 0.95 2.44 3.329(3)    yes
N12 . H122 . O2 2_656 141 0.88 2.48 3.206(3)    yes
N12 . H122 . O5 2_656 149 0.88 2.22 2.999(3)    yes
N8 . H81 . O11 2_766 136 0.89 2.30 3.002(3)    yes
N8 . H81 . O12 2_766 142 0.89 2.05 2.801(3)    yes
N10 . H101 . O7 2_656 174 0.89 2.03 2.920(3)    yes
N1 . H12 . O15 1_565 147 0.88 2.30 3.071(3)    yes
N1 . H12 . O16 1_565 132 0.88 2.46 3.115(3)    yes
N4 . H41 . O3 2_657 149 0.87 2.07 2.854(3)    yes
N2 . H21 . C1 . 149 0.88 2.59 3.372(3)    yes
N2 . H21 . O1 . 176 0.88 1.90 2.779(3)    yes
N3 . H31 . O16 1_565 147 0.88 1.88 2.658(3)    yes
N4 . H42 . O14 . 173 0.87 2.09 2.957(3)    yes
N6 . H61 . O3 2_657 126 0.89 2.59 3.194(3)    yes
N6 . H61 . O4 2_657 155 0.89 1.90 2.733(3)    yes
N7 . H71 . O8 . 138 0.87 2.17 2.880(3)    yes
N7 . H72 . O11 2_766 146 0.87 2.19 2.948(3)    yes
N9 . H91 . O7 . 142 0.89 2.32 3.072(3)    yes
N9 . H91 . O8 . 139 0.89 2.04 2.768(3)    yes
N11 . H112 . O9 . 172 0.88 1.96 2.828(3)    yes
N10 . H102 . O13 . 167 0.87 2.08 2.935(3)    yes
N5 . H51 . O10 . 170 0.89 1.89 2.771(3)    yes
N1 . H11 . O6 . 171 0.87 2.09 2.962(3)    yes
